# Supplementary material for: SPAG5 interacts with CEP55 and exerts oncogenic activities via PI3K/AKT pathway in hepatocellular carcinoma
Source: PubMed Central journal article supplement (PMC6081940; doi:10.1186/s12943-018-0872-3), 2018-08-08

**A**

1.1%

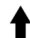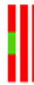

98.9%

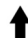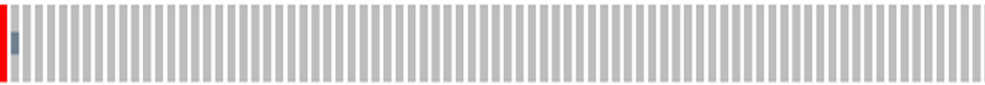

 Amplification     No alterations

**B**

Lymphocytes

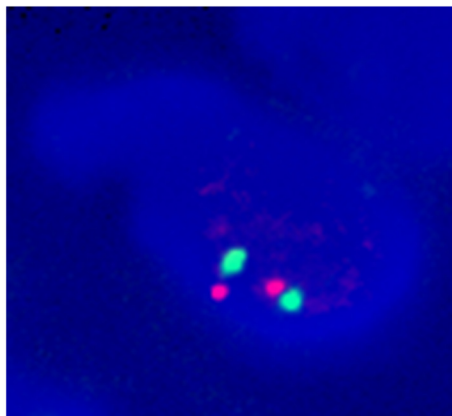

HCC Case 546895

Breast cancer cells

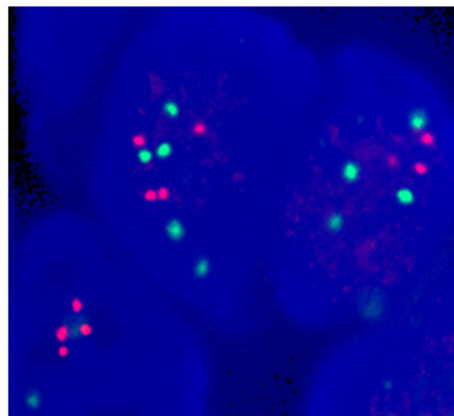

HCC Case 612548

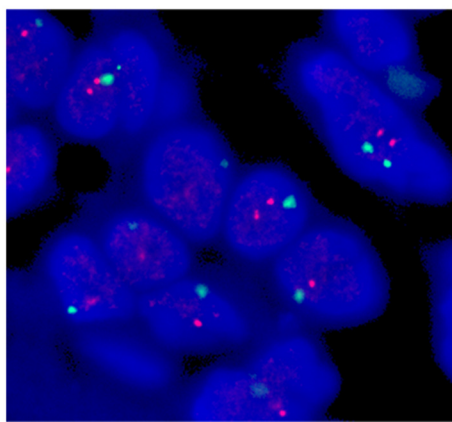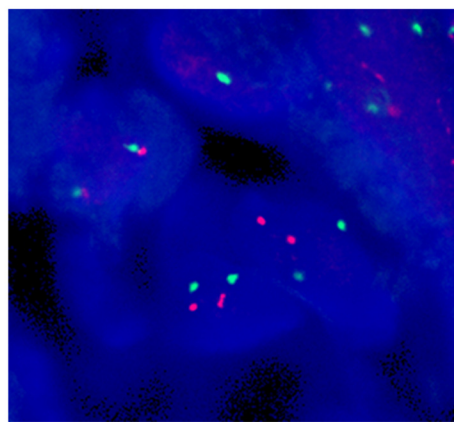

Supplement: 12943_2018_872_MOESM1_ESM.pdf [file 12943_2018_872_MOESM1_ESM.pdf]
